# Supplementary material
Source: PubMed Central journal article supplement (PMC1856441)
Supplement: gut_2005.087106_1.pdf [file gut_2005.087106_1.pdf]

**Table 1. Characteristics of 35 patients with germline APC mutations in the three AFAP-associated regions (5', exon 9 and 3'; codons 1-177, 311-408 and >1580).**

FS = frameshift; n/a = not available.

| Patient ID     | Germline APC mutation | Gender | Age at presentation | Polyp count | Polyps analysed |
|----------------|-----------------------|--------|---------------------|-------------|-----------------|
| AFX MK         | G126X                 | M      | 36                  | 834         | 6               |
| DFAP48         | 141FS                 | F      | 56                  | 2           | 1               |
| AVC.III.2      | Q163X                 | M      | 51                  | 2100        | 4               |
| 554.iv.2/1112  | 170FS                 | F      | 32                  | 1357        | 11              |
| 554.iii.2      | 170FS                 | M      | 50                  | 1077        | 5               |
| 1464/1         | 173FS                 | M      | 39                  | "multiple"  | 3               |
| 673.iii.3/1132 | R332X                 | F      | 49                  | 200-300     | 6               |
| 1571.ii.2      | R332X                 | F      | 68                  | 5           | 5               |
| 578.AA         | R332X                 | F      | n/a                 | n/a         | 4               |
| 578.FPL        | R332X                 | F      | 27                  | 20          | 6               |
| 578.iii.9      | R332X                 | M      | 41                  | n/a         | 17              |
| 578.iv.1       | R332X                 | F      | 43                  | 130         | 14              |
| 578.iv.4       | R332X                 | F      | 27                  | n/a         | 9               |
| 578.iv.7       | R332X                 | M      | n/a                 | n/a         | 15              |
| DFAP16         | R332X                 | M      | 52                  | "multiple"  | 1               |
| DFAP81         | R332X                 | M      | 32                  | <100        | 2               |
| 344-40         | 1597FS                | M      | 47                  | 99          | 4               |
| 344-44         | 1597FS                | M      | 43                  | 50          | 3               |
| 01/266         | 1738FS                | F      | 53                  | 29          | 19              |
| 2233/3         | 1919FS                | n/a    | n/a                 | n/a         | 15              |
| MD2976         | 1919FS                | F      | 43                  | >100        | 21              |
| 77-11          | 1943FS                | M      | 66                  | 500         | 24              |
| 77-12          | 1943FS                | M      | 56                  | 500         | 2               |
| 77-40          | 1943FS                | M      | 39                  | 500         | 2               |
| 1460/6         | 1982 FS               | F      | 65                  | >100        | 5               |
| 1460/28        | 1982 FS               | F      | 33                  | 8           | 1               |
| 1460/42        | 1982 FS               | F      | 33                  | >100        | 4               |
| 1460/88        | 1982 FS               | M      | 48                  | <100        | 1               |
| 1489/10        | 1982 FS               | F      | 29                  | n/a         | 1               |
| 1624/04        | 1982 FS               | F      | 40                  | <100        | 3               |
| S73119         | 2078FS                | F      | 52                  | <100        | 1               |
| DW20284        | 2078FS                | F      | n/a                 | n/a         | 1               |
| J42424         | 2078FS                | F      | n/a                 | n/a         | 3               |
| L12562         | 2078FS                | F      | 60                  | "numerous"  | 3               |
| 110.2.vi       | 2078FS                | F      | n/a                 | 33          | 14              |

**Table 2. Numbers of tumours with evidence of ‘third hits’ (somatic mutation of germline mutant allele) at APC in exon 9- and 3’mutant patients’ polyps**

20AAR1 = truncating mutation before first 20AAR, *etcetera*. Note that these are minimum estimates of the true frequency, not only because we could not screen the entire gene for mutations in small archival polyps, but also because it was not possible to assign all mutations to the germline mutant or wildtype allele.

| Somatic mutation on germline wildtype allele ('second hit') | Somatic mutation on germline mutant allele ('third hit') | No. 5'-mutant patients | No. exon 9-mutant patients | No. 3'-mutant patients |
|-------------------------------------------------------------|----------------------------------------------------------|------------------------|----------------------------|------------------------|
| LOH                                                         | 20AAR3                                                   | 0                      | 6                          | 0                      |
| LOH                                                         | 20AAR2                                                   | 0                      | 0                          | 2                      |
| 20AAR0                                                      | 20AAR3                                                   | 0                      | 2                          | 1                      |
| 20AAR1                                                      | 20AAR3                                                   | 0                      | 2                          | 0                      |
| 20AAR0                                                      | LOH                                                      | 0                      | 0                          | 1                      |
| 20AAR1                                                      | LOH                                                      | 2                      | 4                          | 3                      |
| 20AAR2                                                      | LOH                                                      | 0                      | 0                          | 2                      |
| Not found                                                   | 20AAR3                                                   | 0                      | 20                         | 0                      |
| Not found                                                   | 20AAR2                                                   | 0                      | 2                          | 2                      |
| Not found                                                   | LOH                                                      | 0                      | 0                          | 9                      |

**Table 3. Observed and expected frequencies of somatic mutant APC alleles in AFAP polyyps with ‘three hits’ for ‘kick-start’ and ‘stepwise’ models of tumorigenesis.**  $\alpha_{gl}$  = proportion of germline wild-type allele in polyp;  $\beta_{gl}$  = proportion of germline mutant allele in polyp;  $\beta_{som}$  = proportion of somatic mutant allele in polyp. Observed  $\alpha_{gl}$   $\beta_{gl}$  frequencies were determined from LOH ratios. Observed  $\beta_{som}$  frequencies were similarly determined from LOH ratios generated by PCR amplification of a region encompassing the somatic insertion/deletion and subsequent Genescan analysis (using constitutional DNA from patients with germline mutations identical to the somatic change for normalisation). The observed ‘third’ to ‘second hit’ ratio for polyp 3 was determined by sequencing 58 clones of a PCR product encompassing both somatic changes.

**A. Polyp with one somatic insertion/deletion and loss of the germline wild-type allele.**

| Model                    | Allele frequencies                                    | Polyp 1 | Polyp 2 | Polyp 3 | Polyp 4 | Polyp 5 | Polyp 6 | Polyp 7 | $\chi^2_6$ |
|--------------------------|-------------------------------------------------------|---------|---------|---------|---------|---------|---------|---------|------------|
|                          | Observed $\alpha_{gl}$                                | 0.21    | 0.27    | 0.21    | 0.29    | 0.30    | 0.26    | 0.28    |            |
|                          | Observed $\beta_{som}$                                | 0.64    | 0.52    | 0.49    | 0.52    | 0.33    | 0.40    | 0.27    |            |
| ‘Kick-start’, LOH first  | Expected $\beta_{som} = [(1-2\alpha_{gl})/2]$         | 0.29    | 0.23    | 0.29    | 0.21    | 0.20    | 0.24    | 0.22    | 1.59       |
| ‘Kick-start’, LOH second | Expected $\beta_{som} = (1-2\alpha_{gl})$             | 0.58    | 0.46    | 0.58    | 0.42    | 0.40    | 0.48    | 0.44    | 0.14       |
| ‘Stepwise’               | Expected minimum $\beta_{som}^*$                      | 0.20    | 0.20    | 0.20    | 0.20    | 0.20    | 0.20    | 0.20    | 2.72       |
|                          | Expected maximum $\beta_{som} = [(1-2\alpha_{gl})/2]$ | 0.29    | 0.23    | 0.29    | 0.21    | 0.20    | 0.24    | 0.22    | 1.59       |

\* Assuming that the somatic insertion/deletion can be detected if it comprises >20% of all alleles in the polyp.

**B Polyp with one somatic insertion/deletion and loss of the germline mutant allele.**

| Model                             | Allele frequencies                               | Polyp 8 | Polyp 9 | Polyp 10 | $\chi^2_3$ |
|-----------------------------------|--------------------------------------------------|---------|---------|----------|------------|
|                                   | Observed $\beta_{gl}$                            | 0.33    | 0.10    | 0.24     |            |
|                                   | Observed $\beta_{som}$                           | 0.41    | 0.83    | 0.61     |            |
| ‘Kick-start’ (LOH must be second) | Expected $\beta_{som} = (1-2\beta_{gl})$         | 0.34    | 0.80    | 0.52     | 0.03       |
| ‘Stepwise’                        | Expected minimum $\beta_{som} = (1-2\beta_{gl})$ | 0.34    | 0.80    | 0.52     | 0.03       |
|                                   | Expected maximum $\beta_{som} = (1-\beta_{gl})$  | 0.67    | 0.90    | 0.76     | 0.14       |

**C. Two truncating somatic mutations.**

| Model        | ‘Third’ to ‘second hit’ ratios | Polyp 11 | $\chi^2_1$ |
|--------------|--------------------------------|----------|------------|
|              | Observed                       | 27:31    |            |
| ‘Kick-start’ | Expected                       | 1:1      | 0.03       |
| ‘Stepwise’   | Expected minimum               | 1:4      | 14.4       |
|              | Expected maximum               | 1:1      | 0.03       |

\* Assuming a detection sensitivity of 20% for the somatic ‘third hit’.
